# Supplementary material
Source: PubMed Central journal article supplement (PMC3244665)
Supplement: supp_radiol.11111026_appendix.pdf [file supp_radiol.11111026_appendix.pdf]

## **APPENDIX E1**

In this Appendix, we will present supporting text, tables, and figures. The document is structured into five sections as follows: Section A consists of Table E1, which shows the demographic and experience characteristics of the 107 radiologists included in the analysis sample. Section B consists of Tables E2 and E3, which show distribution of characteristics by radiologist-specific average annual diagnostic volume for mammography performed for additional imaging and for mammography performed to assess a breast concern or problem. Section C includes a boxplot of each volume measure, prior to range restrictions imposed when modeling the relationship between volume and diagnostic performance. Section D provides a detailed description of how to interpret graphical results based on natural cubic spline modeling. Section E offers graphical representation of primary results based on natural cubic spline modeling for each volume measure and performance measure combination stratified by type of diagnostic mammogram (additional imaging vs breast concern or problem mammography). Section F contains tabular results for analyses of screening and total volume. Section G pertains to tumor characteristics.

## Section A

**Table E1. Demographic and Experience Characteristics of 107 Radiologists included in the Analysis Sample Compared with Original Sample of 214 Survey Respondents**

| Characteristic                                                                    | All Eligible Radiologists ( <i>n</i> = 214) | Radiologists in Analysis ( <i>n</i> = 107)* |
|-----------------------------------------------------------------------------------|---------------------------------------------|---------------------------------------------|
| <b>Demographics</b>                                                               |                                             |                                             |
| Age at survey                                                                     |                                             |                                             |
| <45 y                                                                             | 62 (29)                                     | 26 (24)                                     |
| 45—54 y                                                                           | 70 (33)                                     | 31 (29)                                     |
| ≥55 y                                                                             | 82 (38)                                     | 50 (47)                                     |
| Gender                                                                            |                                             |                                             |
| Male                                                                              | 150 (70)                                    | 71 (66)                                     |
| Female                                                                            | 64 (30)                                     | 36 (34)                                     |
| Work full time (≥40 hrs/week)                                                     |                                             |                                             |
| No                                                                                | 47 (22)                                     | 26 (25)                                     |
| Yes                                                                               | 164 (78)                                    | 79 (75)                                     |
| Unknown                                                                           | 3 (1)                                       | 2 (2)                                       |
| Affiliation with academic medical center                                          |                                             |                                             |
| No affiliation                                                                    | 168 (80)                                    | 77 (73)                                     |
| Adjunct                                                                           | 21 (10)                                     | 9 (8)                                       |
| Primary                                                                           | 22 (10)                                     | 20 (19)                                     |
| Unknown                                                                           | 3 (1)                                       | 1 (1)                                       |
| <b>Experience</b>                                                                 |                                             |                                             |
| Combined variable of fellowship training and duration of mammogram interpretation |                                             |                                             |
| No fellowship, <10 y                                                              | 42 (20)                                     | 17 (16)                                     |
| No fellowship, 10—19 y                                                            | 69 (32)                                     | 33 (31)                                     |
| No fellowship, ≥20 y                                                              | 86 (40)                                     | 49 (46)                                     |
| Fellowship, <10 y                                                                 | 8 (4)                                       | 3 (3)                                       |
| Fellowship, ≥10 y                                                                 | 9 (4)                                       | 5 (5)                                       |
| Time working in breast imaging                                                    |                                             |                                             |
| <20%                                                                              | 56 (27)                                     | 27 (26)                                     |
| 20%—39%                                                                           | 58 (28)                                     | 26 (25)                                     |
| 40%—79%                                                                           | 29 (14)                                     | 15 (15)                                     |
| 80%—100%                                                                          | 64 (31)                                     | 35 (34)                                     |
| Unknown                                                                           | 7 (3)                                       | 4 (4)                                       |

Note.—Data are numbers of radiologists, and data in parentheses are percentages. Unknown percentages are based on all 214 or 107 radiologists; remaining percentages are based on the number of with the characteristic known.

\* Subset of 214 eligible radiologists.

## Section B

**Table E2. Distribution of Characteristics for Additional Imaging Diagnostic Mammograms by Radiologist-specific Average Annual Diagnostic Volume**

| Characteristic                     | Total No. of Mammograms (n = 46 369) | Total Percentage of Mammograms | Average Annual Diagnostic Volume (%) |                                |                                |                                  |                                |                           |
|------------------------------------|--------------------------------------|--------------------------------|--------------------------------------|--------------------------------|--------------------------------|----------------------------------|--------------------------------|---------------------------|
|                                    |                                      |                                | <100 Mammograms (n = 853)            | 100--199 Mammograms (n = 1219) | 200--299 Mammograms (n = 6645) | 300--499 Mammograms (n = 14 398) | 500--999 Mammograms (n = 8028) | ≥1000 Mammograms (15 226) |
| <b>Age</b>                         |                                      |                                |                                      |                                |                                |                                  |                                |                           |
| <40 y                              | 1694                                 | 4                              | 4                                    | 3                              | 3                              | 3                                | 3                              | 5                         |
| 40--49 y                           | 16 132                               | 35                             | 34                                   | 33                             | 33                             | 30                               | 33                             | 41                        |
| 50--59 y                           | 14 243                               | 31                             | 29                                   | 33                             | 31                             | 31                               | 31                             | 30                        |
| 60--69 y                           | 7994                                 | 17                             | 17                                   | 18                             | 18                             | 19                               | 18                             | 14                        |
| 70--79 y                           | 4578                                 | 10                             | 11                                   | 8                              | 10                             | 12                               | 10                             | 8                         |
| ≥80 y                              | 1728                                 | 4                              | 4                                    | 3                              | 4                              | 5                                | 4                              | 2                         |
| <b>Breast density</b>              |                                      |                                |                                      |                                |                                |                                  |                                |                           |
| Almost entirely fat                | 1783                                 | 5                              | 8                                    | 3                              | 3                              | 3                                | 4                              | 7                         |
| Scattered fibroglandular tissue    | 15 534                               | 40                             | 45                                   | 49                             | 47                             | 41                               | 35                             | 37                        |
| Heterogeneously dense              | 19 063                               | 49                             | 41                                   | 43                             | 44                             | 48                               | 52                             | 52                        |
| Extremely dense                    | 2403                                 | 6                              | 7                                    | 4                              | 6                              | 7                                | 9                              | 4                         |
| Unknown                            | 7586                                 | 16                             | 26                                   | 9                              | 2                              | 12                               | 9                              | 31                        |
| <b>First-degree family history</b> |                                      |                                |                                      |                                |                                |                                  |                                |                           |
| No                                 | 33 892                               | 82                             | 85                                   | 85                             | 84                             | 82                               | 82                             | 82                        |
| Yes                                | 7217                                 | 18                             | 15                                   | 15                             | 16                             | 18                               | 18                             | 18                        |
| Unknown                            | 5260                                 | 11                             | 21                                   | 8                              | 10                             | 14                               | 15                             | 8                         |
| <b>SRL</b>                         |                                      |                                |                                      |                                |                                |                                  |                                |                           |
| No                                 | 41 555                               | 98                             | 97                                   | 98                             | 99                             | 98                               | 98                             | 97                        |
| Yes                                | 971                                  | 2                              | 3                                    | 2                              | 1                              | 2                                | 2                              | 3                         |
| Unknown                            | 3843                                 | 8                              | 18                                   | 5                              | 10                             | 12                               | 11                             | 2                         |
| <b>Time since last mammography</b> |                                      |                                |                                      |                                |                                |                                  |                                |                           |
| No previous mammography            | 3706                                 | 8                              | 9                                    | 6                              | 8                              | 8                                | 8                              | 10                        |
| <12 mo                             | 1918                                 | 4                              | 4                                    | 4                              | 5                              | 4                                | 5                              | 4                         |
| 12--35 mo                          | 33 201                               | 75                             | 71                                   | 77                             | 75                             | 76                               | 76                             | 75                        |
| 35--59 mo                          | 3022                                 | 7                              | 10                                   | 7                              | 7                              | 7                                | 7                              | 7                         |
| ≥60 mo                             | 2176                                 | 5                              | 6                                    | 5                              | 5                              | 5                                | 5                              | 5                         |
| Unknown                            | 2346                                 | 5                              | 9                                    | 4                              | 4                              | 6                                | 6                              | 4                         |
| <b>Average annual total volume</b> |                                      |                                |                                      |                                |                                |                                  |                                |                           |
| <480 mammograms                    | 17                                   | 0                              | 2                                    | 0                              | 0                              | 0                                | 0                              | 0                         |
| 480--1000 mammograms               | 1890                                 | 4                              | 59                                   | 55                             | 11                             | 0                                | 0                              | 0                         |
| 1000--1499 mammograms              | 6326                                 | 14                             | 29                                   | 38                             | 43                             | 19                               | 0                              | 0                         |
| 1500--1999 mammograms              | 5018                                 | 11                             | 0                                    | 0                              | 20                             | 25                               | 0                              | 0                         |
| 2000--2999 mammograms              | 10 962                               | 24                             | 0                                    | 0                              | 26                             | 47                               | 31                             | 0                         |
| 3000--4999 mammograms              | 9976                                 | 22                             | 10                                   | 6                              | 0                              | 7                                | 50                             | 31                        |
| ≥5000                              | 12 180                               | 26                             | 0                                    | 0                              | 0                              | 1                                | 19                             | 69                        |

|                                 |        |    |    |    |    |    |    |    |    |
|---------------------------------|--------|----|----|----|----|----|----|----|----|
| mammograms                      |        |    |    |    |    |    |    |    |    |
| Average annual screening volume |        |    |    |    |    |    |    |    |    |
| <480                            | 122    | 0  | 14 | 0  | 0  | 0  | 0  | 0  | 0  |
| mammograms 480—1000             | 5073   | 11 | 56 | 59 | 37 | 10 | 0  | 0  | 0  |
| mammograms 1000—1499            | 5361   | 12 | 20 | 35 | 22 | 23 | 0  | 0  | 0  |
| mammograms 1500—1999            | 9153   | 20 | 0  | 0  | 36 | 39 | 14 | 0  | 0  |
| mammograms 2000—2999            | 8257   | 18 | 10 | 0  | 6  | 25 | 36 | 8  | 8  |
| mammograms ≥3000                | 18 403 | 40 | 0  | 6  | 0  | 3  | 50 | 92 | 92 |
| mammograms                      |        |    |    |    |    |    |    |    |    |
| Average annual diagnostic focus |        |    |    |    |    |    |    |    |    |
| ≤10%                            | 2287   | 5  | 66 | 41 | 14 | 2  | 0  | 0  | 0  |
| 11%--15%                        | 6350   | 14 | 21 | 14 | 38 | 16 | 8  | 4  | 4  |
| 16%--20%                        | 18 307 | 39 | 12 | 25 | 32 | 53 | 74 | 14 | 14 |
| 21%--25%                        | 11 947 | 26 | 0  | 20 | 10 | 22 | 10 | 46 | 46 |
| >25%                            | 7478   | 16 | 0  | 0  | 7  | 6  | 7  | 36 | 36 |

Note.---Unless otherwise indicated, data are percentages. Unknown percentages are based on all mammograms; remaining percentages are based on mammograms with the characteristic known. SRL = self-reported lump.

**Table E3. Distribution of Characteristics for Breast Concern or Problem Diagnostic Mammograms by Radiologist-specific Average Annual Diagnostic Volume**

| Characteristic                     | Total No. of Mammograms (n = 70 767) | Total Percentage of Mammograms | Average Annual Diagnostic Volume |                               |                               |                                 |                               |                               |
|------------------------------------|--------------------------------------|--------------------------------|----------------------------------|-------------------------------|-------------------------------|---------------------------------|-------------------------------|-------------------------------|
|                                    |                                      |                                | <100 Mammograms (n = 1044)       | 100—199 Mammograms (n = 1340) | 200—299 Mammograms (n = 4814) | 300—499 Mammograms (n = 13 984) | 500—999 Mammograms (n = 9230) | ≥1000 Mammograms (n = 40 355) |
| <b>Age</b>                         |                                      |                                |                                  |                               |                               |                                 |                               |                               |
| <40 y                              | 11 973                               | 17                             | 21                               | 18                            | 21                            | 16                              | 14                            | 17                            |
| 40—49 y                            | 20 219                               | 29                             | 34                               | 33                            | 30                            | 29                              | 28                            | 28                            |
| 50—59 y                            | 17 913                               | 25                             | 21                               | 24                            | 22                            | 24                              | 28                            | 26                            |
| 60—69 y                            | 10 749                               | 15                             | 11                               | 14                            | 13                            | 15                              | 16                            | 15                            |
| 70—79 y                            | 6769                                 | 10                             | 9                                | 7                             | 9                             | 10                              | 9                             | 9                             |
| ≥80 y                              | 3144                                 | 4                              | 4                                | 3                             | 5                             | 5                               | 5                             | 4                             |
| <b>Breast density</b>              |                                      |                                |                                  |                               |                               |                                 |                               |                               |
| Almost entirely fat                | 4250                                 | 9                              | 17                               | 5                             | 6                             | 6                               | 10                            | 11                            |
| Scattered fibroglandular tissue    | 18 064                               | 37                             | 37                               | 41                            | 41                            | 37                              | 38                            | 36                            |
| Heterogeneously dense              | 20 706                               | 43                             | 35                               | 43                            | 43                            | 45                              | 39                            | 43                            |
| Extremely dense                    | 5466                                 | 11                             | 11                               | 10                            | 11                            | 12                              | 13                            | 11                            |
| Unknown                            | 22 281                               | 31                             | 35                               | 30                            | 3                             | 13                              | 13                            | 45                            |
| <b>First-degree family history</b> |                                      |                                |                                  |                               |                               |                                 |                               |                               |
| No                                 | 51 605                               | 82                             | 85                               | 84                            | 83                            | 83                              | 81                            | 82                            |
| Yes                                | 11 247                               | 18                             | 15                               | 16                            | 17                            | 17                              | 19                            | 18                            |
| Unknown                            | 7915                                 | 11                             | 17                               | 10                            | 7                             | 14                              | 15                            | 10                            |
| <b>SRL</b>                         |                                      |                                |                                  |                               |                               |                                 |                               |                               |

|                                 |        |    |    |    |    |    |    |    |
|---------------------------------|--------|----|----|----|----|----|----|----|
| No                              | 43 788 | 67 | 56 | 55 | 43 | 61 | 70 | 71 |
| Yes                             | 21 903 | 33 | 44 | 45 | 57 | 39 | 30 | 29 |
| Unknown                         | 5076   | 7  | 10 | 9  | 7  | 8  | 8  | 7  |
| Time since last mammography     |        |    |    |    |    |    |    |    |
| No previous mammography         | 6307   | 10 | 15 | 14 | 16 | 12 | 9  | 8  |
| <12 mo                          | 20 283 | 32 | 37 | 29 | 29 | 32 | 38 | 31 |
| 12–35 mo                        | 31 112 | 49 | 34 | 46 | 41 | 47 | 45 | 52 |
| 35–59 mo                        | 3519   | 5  | 8  | 6  | 8  | 6  | 5  | 5  |
| ≥60 mo                          | 2785   | 4  | 6  | 5  | 6  | 4  | 4  | 4  |
| Unknown                         | 6761   | 10 | 12 | 7  | 7  | 9  | 6  | 11 |
| Average annual total volume     |        |    |    |    |    |    |    |    |
| <480 mammograms                 | 6      | 0  | 1  | 0  | 0  | 0  | 0  | 0  |
| 480–1000 mammograms             | 1494   | 2  | 67 | 43 | 5  | 0  | 0  | 0  |
| 1000–1499 mammograms            | 4259   | 6  | 31 | 31 | 40 | 12 | 0  | 0  |
| 1500–1999 mammograms            | 4135   | 6  | 2  | 0  | 25 | 21 | 0  | 0  |
| 2000–2999 mammograms            | 11 241 | 16 | 0  | 0  | 31 | 49 | 32 | 0  |
| 3000–4999 mammograms            | 12 141 | 17 | 0  | 26 | 0  | 13 | 47 | 14 |
| ≥5000 mammograms                | 37 491 | 53 | 0  | 0  | 0  | 6  | 22 | 86 |
| Average annual screening volume |        |    |    |    |    |    |    |    |
| <480 mammograms                 | 105    | 0  | 10 | 0  | 0  | 0  | 0  | 0  |
| 480–1000 mammograms             | 3111   | 4  | 67 | 45 | 28 | 3  | 0  | 0  |
| 1000–1499 mammograms            | 4154   | 6  | 22 | 28 | 19 | 19 | 0  | 0  |
| 1500–1999 mammograms            | 9429   | 13 | 2  | 0  | 41 | 38 | 24 | 0  |
| 2000–2999 mammograms            | 15 447 | 22 | 0  | 0  | 12 | 28 | 29 | 21 |
| ≥3000 mammograms                | 38 521 | 54 | 0  | 26 | 0  | 13 | 47 | 79 |
| Average annual diagnostic focus |        |    |    |    |    |    |    |    |
| ≤10%                            | 3694   | 5  | 54 | 55 | 19 | 11 | 0  | 0  |
| 11%–15%                         | 6862   | 10 | 33 | 13 | 48 | 15 | 6  | 3  |
| 16%–20%                         | 15 960 | 23 | 13 | 16 | 26 | 59 | 54 | 3  |
| 21%–25%                         | 10 497 | 15 | 0  | 16 | 3  | 14 | 2  | 20 |
| >25%                            | 33 754 | 48 | 0  | 0  | 4  | 2  | 38 | 74 |

Note.---Unless otherwise indicated, data are percentages. Unknown percentages are based on all mammograms; remaining percentages are based on mammograms with the characteristic known.

# Section C

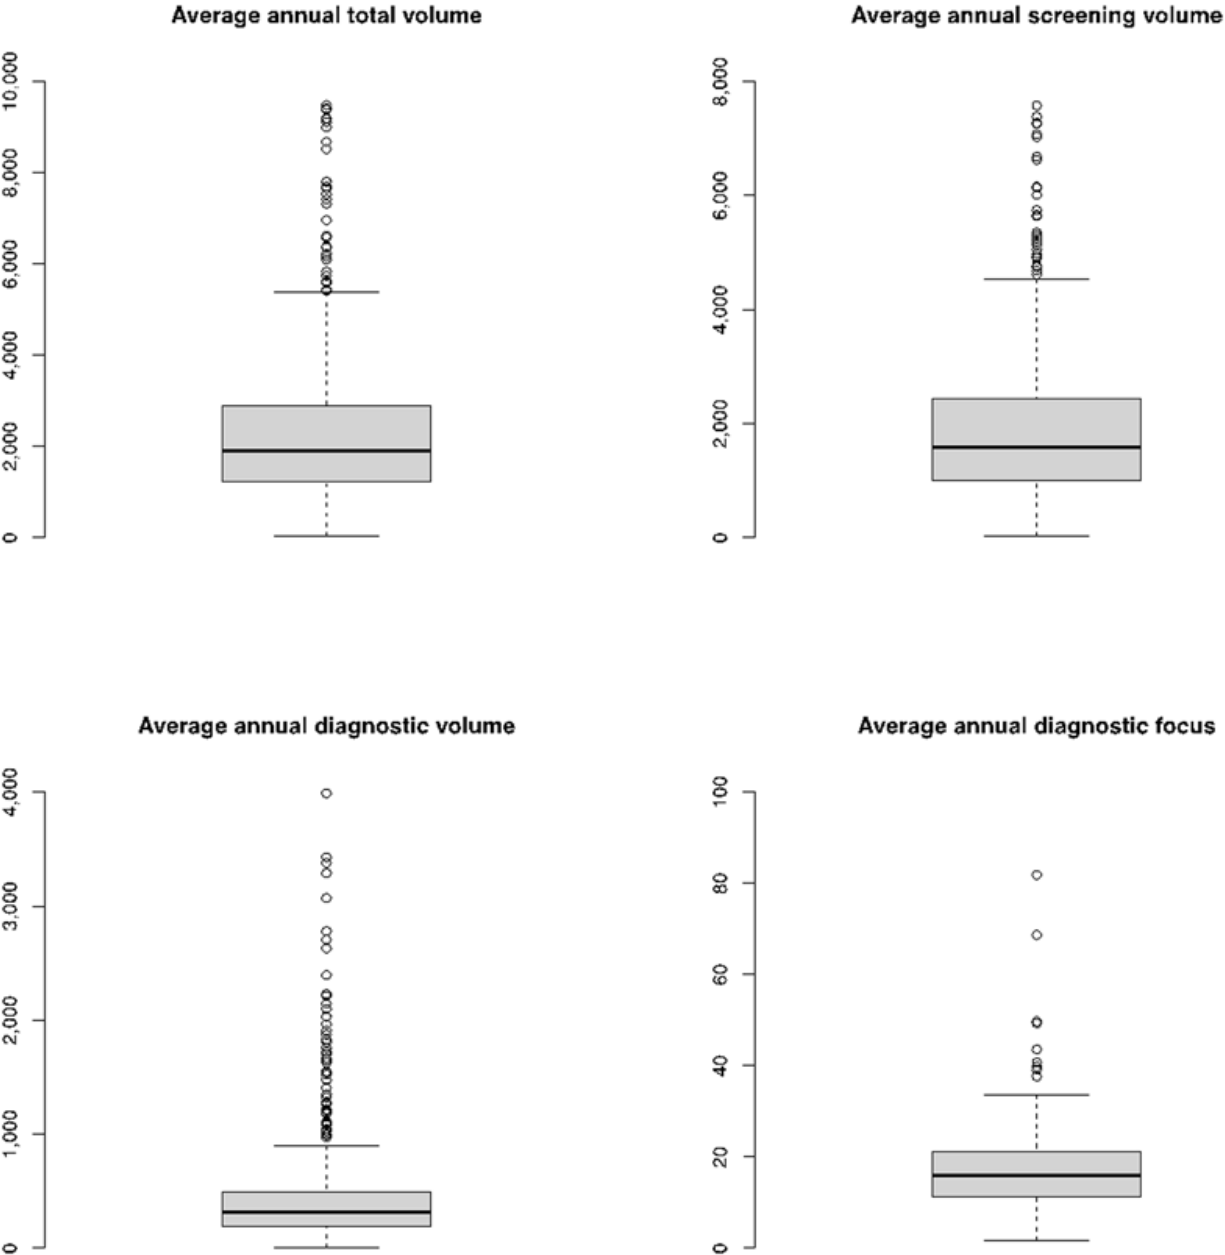

**Figure E1:** Boxplots of each volume measure, prior to range restrictions imposed when modeling the relationship between volume and diagnostic performance.

## Section D

Results from primary analyses, in which we examined the association between interpretive volume and diagnostic mammography performance, are presented in Figures E4 through E7. Each subfigure uses a natural cubic spline to provide a flexible specification of the odds ratio (OR) association (22).

Here we provide a detailed description of how to interpret the graphic representation of the results corresponding to the association between diagnostic volume and sensitivity for additional imaging diagnostic mammography. This relationship is given by the upper left image in Figure E4.

### Interpretation of a Standard Analysis

When modeling the association between a continuous exposure and some outcome, consideration should be given to whether or not the association is linear. One common strategy to relax the linearity assumption is to categorize the continuous exposure and model the association via a series of dummy variables. Table E2 presents estimated ORs and 95% confidence intervals (CIs) from a logistic regression analysis of sensitivity for additional imaging diagnostic mammography with the continuous exposure (diagnostic volume) categorized into six groups: 0—250 mammograms, 250—499 mammograms, 500—999 mammograms, 1000—1499 mammograms, 1500—1999 mammograms, and 2000—2500 mammograms. As in the article, the model was adjusted for study registry, patient-level characteristics (age, family history, self-reported presence of a lump (SRL), and time since last mammography) and radiologist-level characteristics (years of mammogram interpretation and percentage of time working in breast imaging).

Table E2 indicates that there are five OR parameters that summarize the effect of diagnostic volume; one for each volume category being compared with the reference 1000–1499-mammogram group. Consider the results for the 500–999-mammogram group (OR = 0.55; 95% CI: 0.28, 1.09). To obtain a precise interpretation of this estimate, consider two mammograms read by two radiologists: Mammogram 1 was interpreted by a radiologist who read 600 diagnostic mammograms in the previous year. Mammogram 2 was interpreted by a radiologist who read 1000 diagnostic mammograms in the previous year. Otherwise, the mammograms are assumed to be the same in terms of the other characteristics included in the model. In Table E2, we see that the adjusted odds of a true-positive result for mammogram are estimated to be 0.55 times the adjusted odds of a true-positive result for mammography. Similarly, for a third mammogram (Mammogram 3) interpreted by a radiologist who read 200 diagnostic mammograms in the prior year, the relative odds of a true-positive finding would be 0.42 (95% CI: 0.22, 0.82).

Note, if Mammogram 1 had been interpreted by a radiologist with a diagnostic volume of 850 mammograms in the previous year, the estimated relative odds would be the same as if he or she had interpreted 500 mammograms (0.55). This is a consequence of the categorization of diagnostic volume and the choice of referent category and can be seen explicitly in the graphic representation of Table E2 (Fig E2); the black lines represent the OR estimates, and the grey lines are the 95% CIs. Finally, since the OR scale is not symmetric around 1.0, we used the log-scale for the y-axis, although the labels are based on the OR scale (in their appropriate locations).

### **Interpretation of the Natural Cubic Spline Analysis**

The choice of the six categories in Table E2 and Figure E2, as well as the cutoffs, is somewhat arbitrary and may be restrictive. One could easily increase flexibility by performing a similar analysis with a greater number of diagnostic volume categories. A trade-off, however, is that



additional parameters (corresponding to the new groups) would need to be estimated. Since the sample size would not change, this would lead to greater uncertainty; standard errors would increase, CIs would widen, and power to detect an association would be reduced. Natural cubic splines provide an alternative modeling strategy that is extremely flexible in its specification of the model while being parsimonious in the number of parameters. For example, the analyses we present in the article use a natural cubic spline with a single knot located at the midpoint of the prespecified volume ranges; such a model requires only two parameters. Hastie et al (22) provide an excellent summary of technical details regarding splines and related techniques.

One drawback of the use of splines is that the model parameters are difficult to interpret directly. As such, a common approach to presenting the estimated ORs and 95% CIs is to do so graphically. Figure E3 provides such a representation for the analysis of the association between diagnostic volume and sensitivity for additional imaging diagnostic mammography. Note, this is the same as the upper left figure of Figure E4. Similar to Figure E2, the black line represents the estimated OR and the grey lines represent 95% CIs, both of which are interpreted in exactly the same way as in Figure E2. Specifically, consider two mammograms interpreted by two radiologists, one who interpreted 2000 diagnostic mammograms in the previous year and one who interpreted 1000 diagnostic mammograms in the previous year. The vertical dashed lines indicate the two mammograms in Figure E3. The height of the right-most dashed line is 0.43 (95% CI: 0.29, 0.64). One could interpret the height of the curve at any point along the x-axis in the same way.

Note that while the 1000–1499 mammogram group is taken to be the reference category in Table E2 and Figure E2, the reference group in Figure E3 is the single value of 1000. For both sets of analyses (Figs E2, E3), the choice of reference group does not affect the relative differences across the groups (the shape of the association), nor does it impact significance.

**Table E4. Estimated Adjusted OR Associations between Diagnostic Volume and Sensitivity for Additional Imaging Diagnostic Mammography Based on a Categorization of the Volume Measure with 6 Groups**

| Diagnostic Volume Category | Sensitivity       |
|----------------------------|-------------------|
| 0–250 mammograms           | 0.42 (0.22, 0.82) |
| 250–499 mammograms         | 0.38 (0.18, 0.83) |
| 500–999 mammograms         | 0.55 (0.28, 1.09) |
| 1000–1499 mammograms       | 1.00 (NA)         |
| 1500–1999 mammograms       | 0.19 (0.11, 0.34) |
| 2000–2500 mammograms       | 0.22 (0.12, 0.40) |

Note.---Data are odds ratios, and data in parentheses are 95% CIs. NA = not applicable.

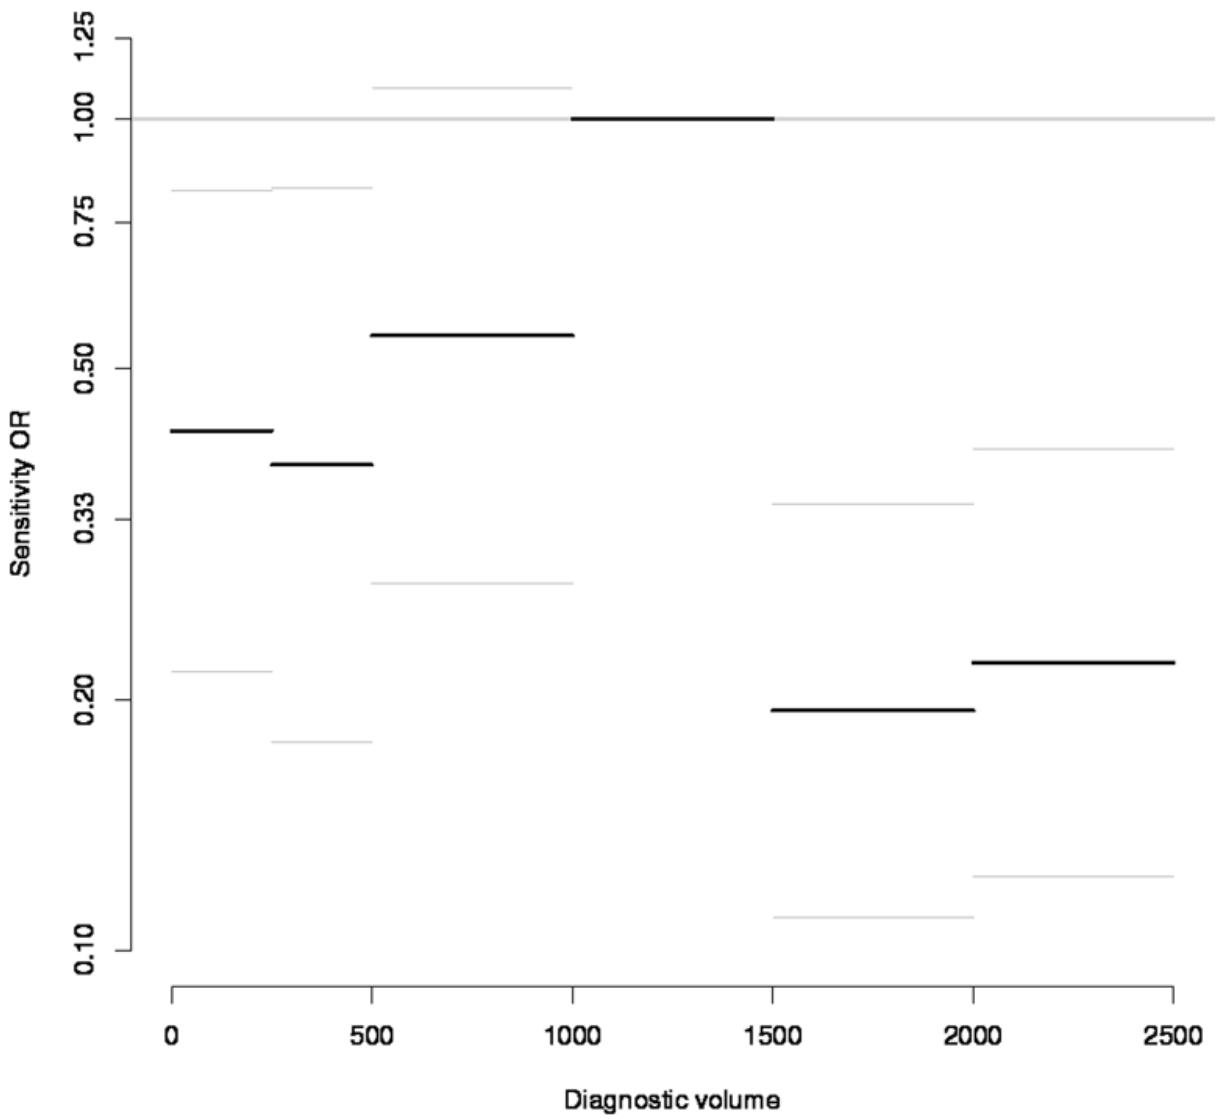

**Figure E2:** Graph shows estimated adjusted OR associations between diagnostic volume and sensitivity for additional imaging diagnostic mammography based on a categorization of the volume measure with six groups. Gray lines are pointwise 95% confidence intervals.

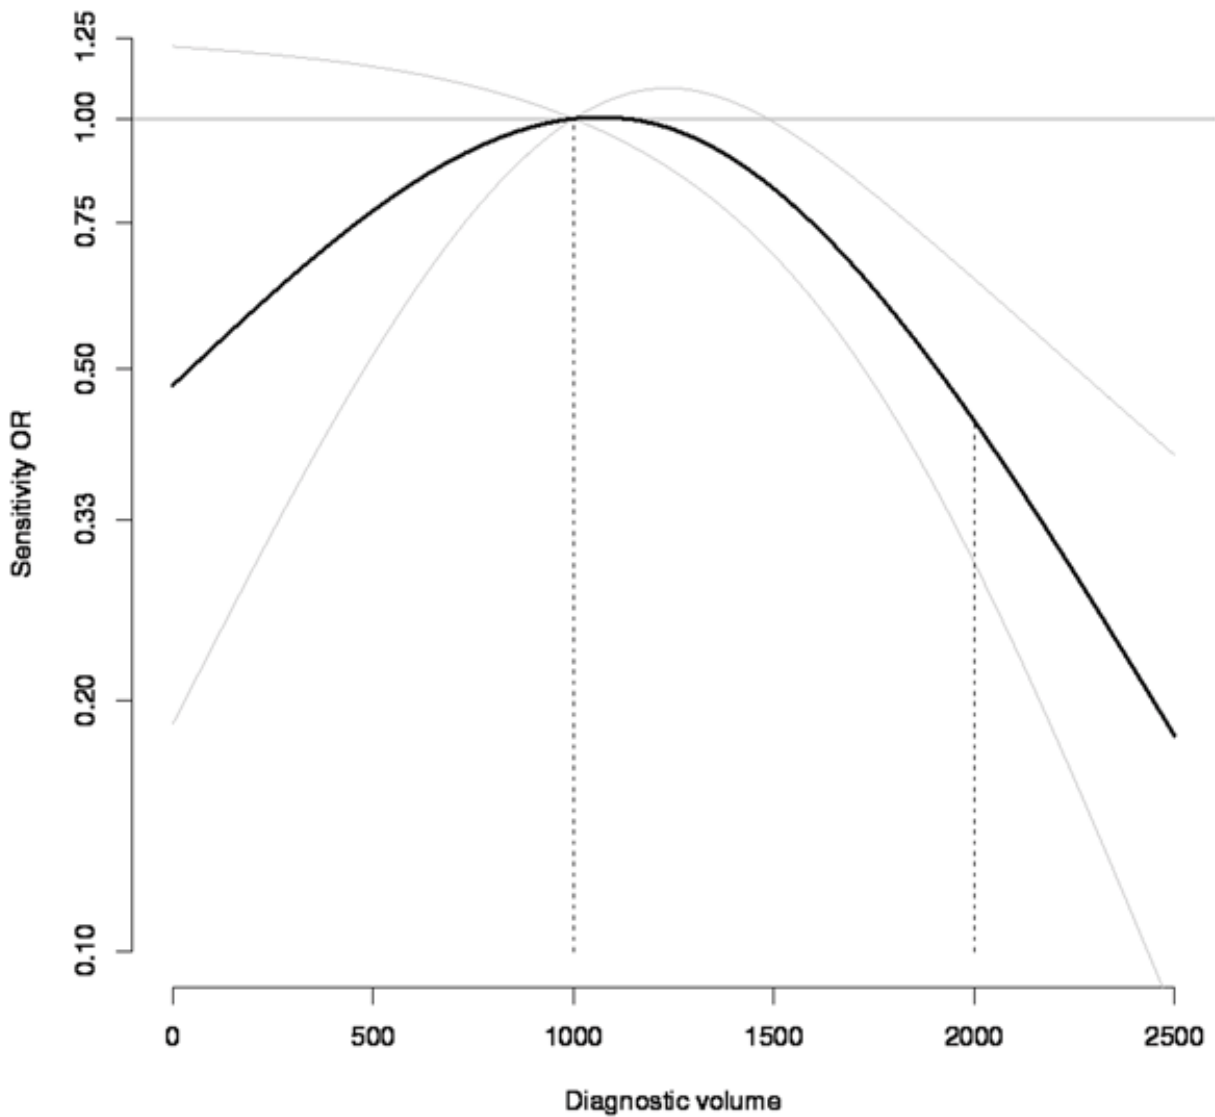

**Figure E3:** Estimated adjusted OR associations between diagnostic volume and sensitivity for additional imaging diagnostic mammography based on a natural cubic spline representation for the volume effect. Gray lines are pointwise 95% CIs. Dashed lines indicate two mammograms read by radiologists, one with a diagnostic volume of 1000 mammograms and the other with a diagnostic volume of 2000 mammograms.

## Section E

The following graphs show the primary results based on natural cubic spline modeling for each volume measure and performance measure combination, stratified by type of diagnostic mammogram (additional imaging vs breast concern or problem mammography). Figures E4 and E5 correspond to Tables 4 and 5, respectively. Figures E6 and E7 correspond to Tables E5 and E6 in section E.

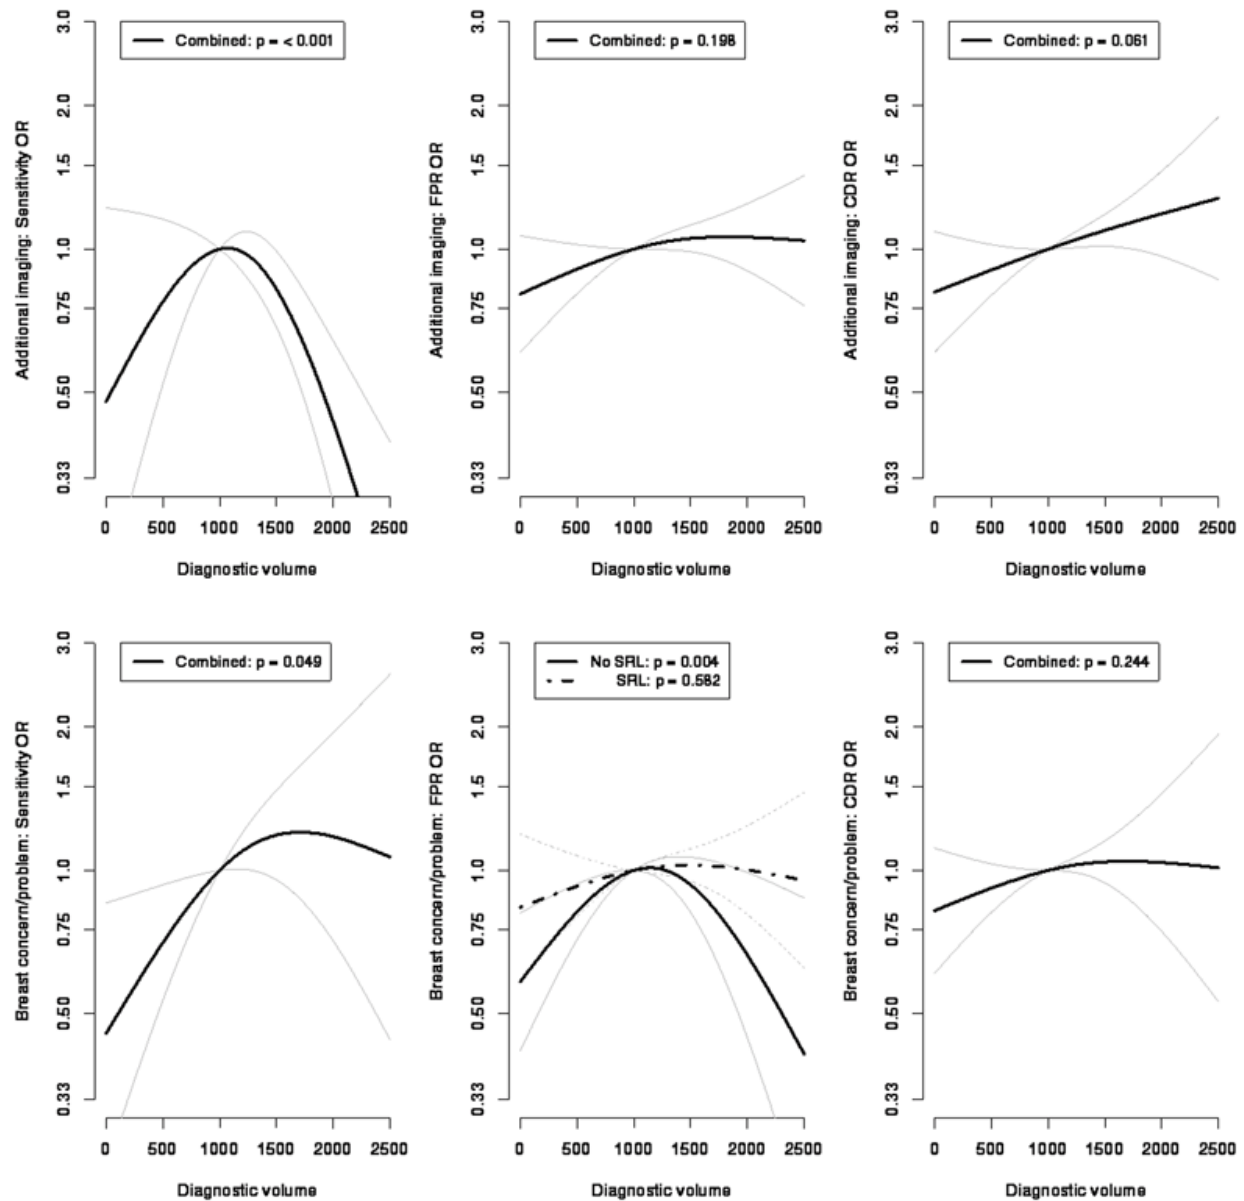

**Figure E4:** Graphs show adjusted OR associations between diagnostic volume and sensitivity, FPR, and CDR. The upper row is for additional imaging diagnostic mammography; the lower row is for breast concern or problem diagnostic mammography. Results for breast concern or problem diagnostic mammography models where an interaction with SRL is significant are stratified by SRL. Gray lines are pointwise 95% CIs; *P* values represent tests of whether or not there is an association based on the combined sample or within SRL strata.

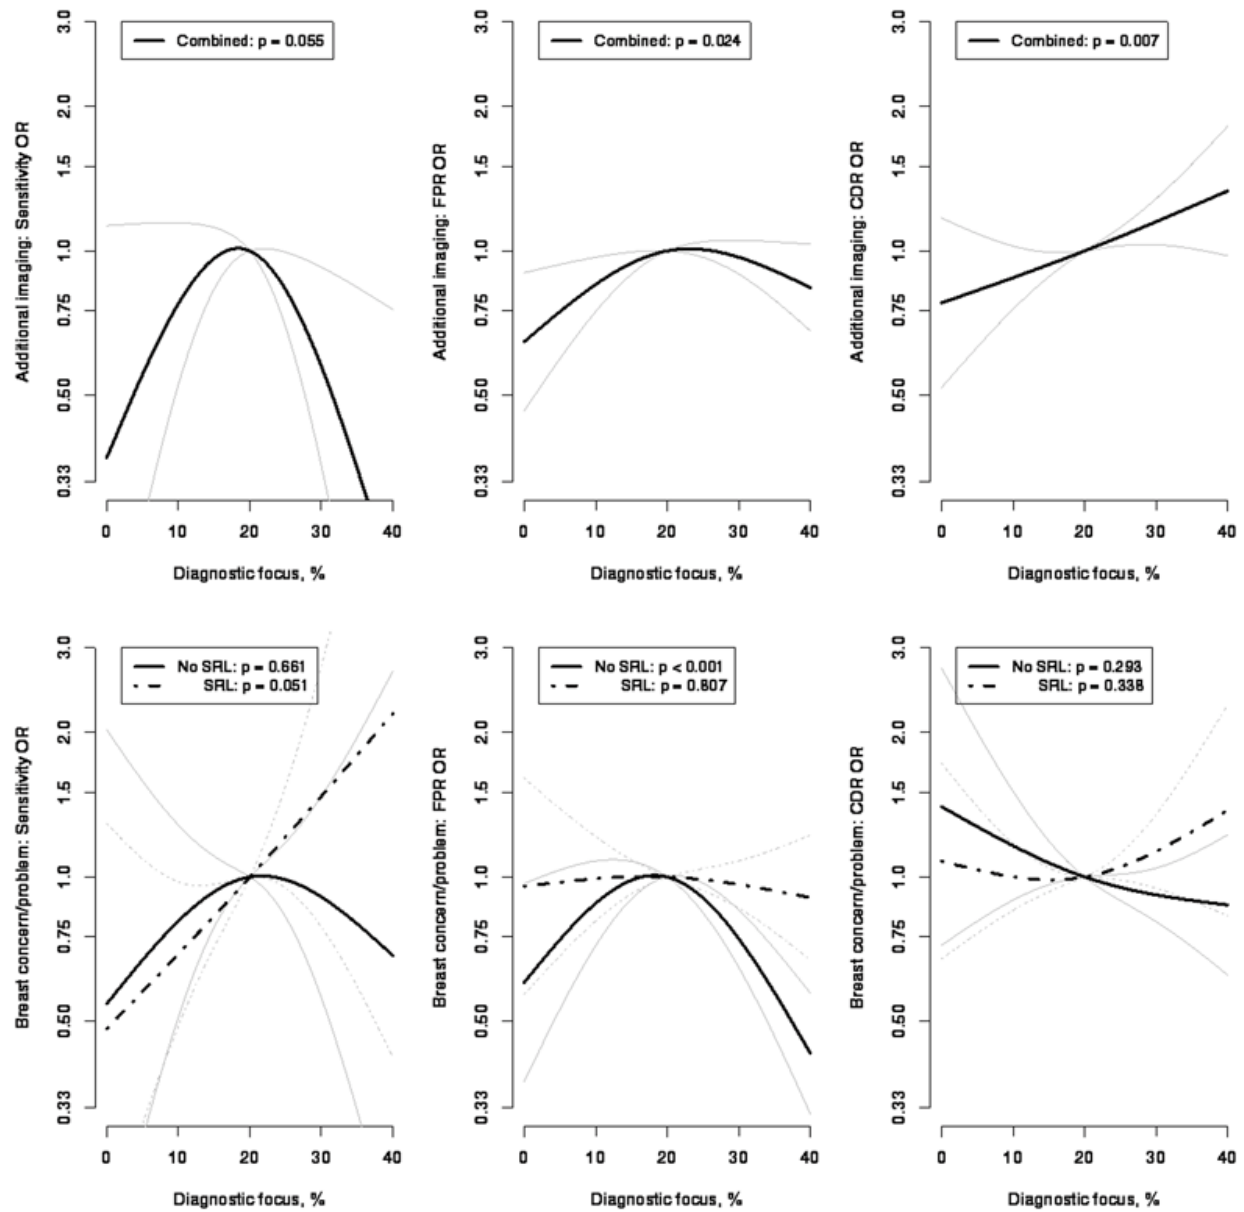

**Figure E5:** Graphs show adjusted OR associations between diagnostic focus and sensitivity, FPR, and CDR. The upper row is for additional imaging diagnostic mammography; the lower row is for breast concern or problem diagnostic mammography. Results for breast concern or problem diagnostic mammography models where an interaction with SRL is significant are stratified by SRL. Gray lines are pointwise 95% CIs; *P* values represent tests of whether or not there is an association based on the combined sample or within SRL strata.

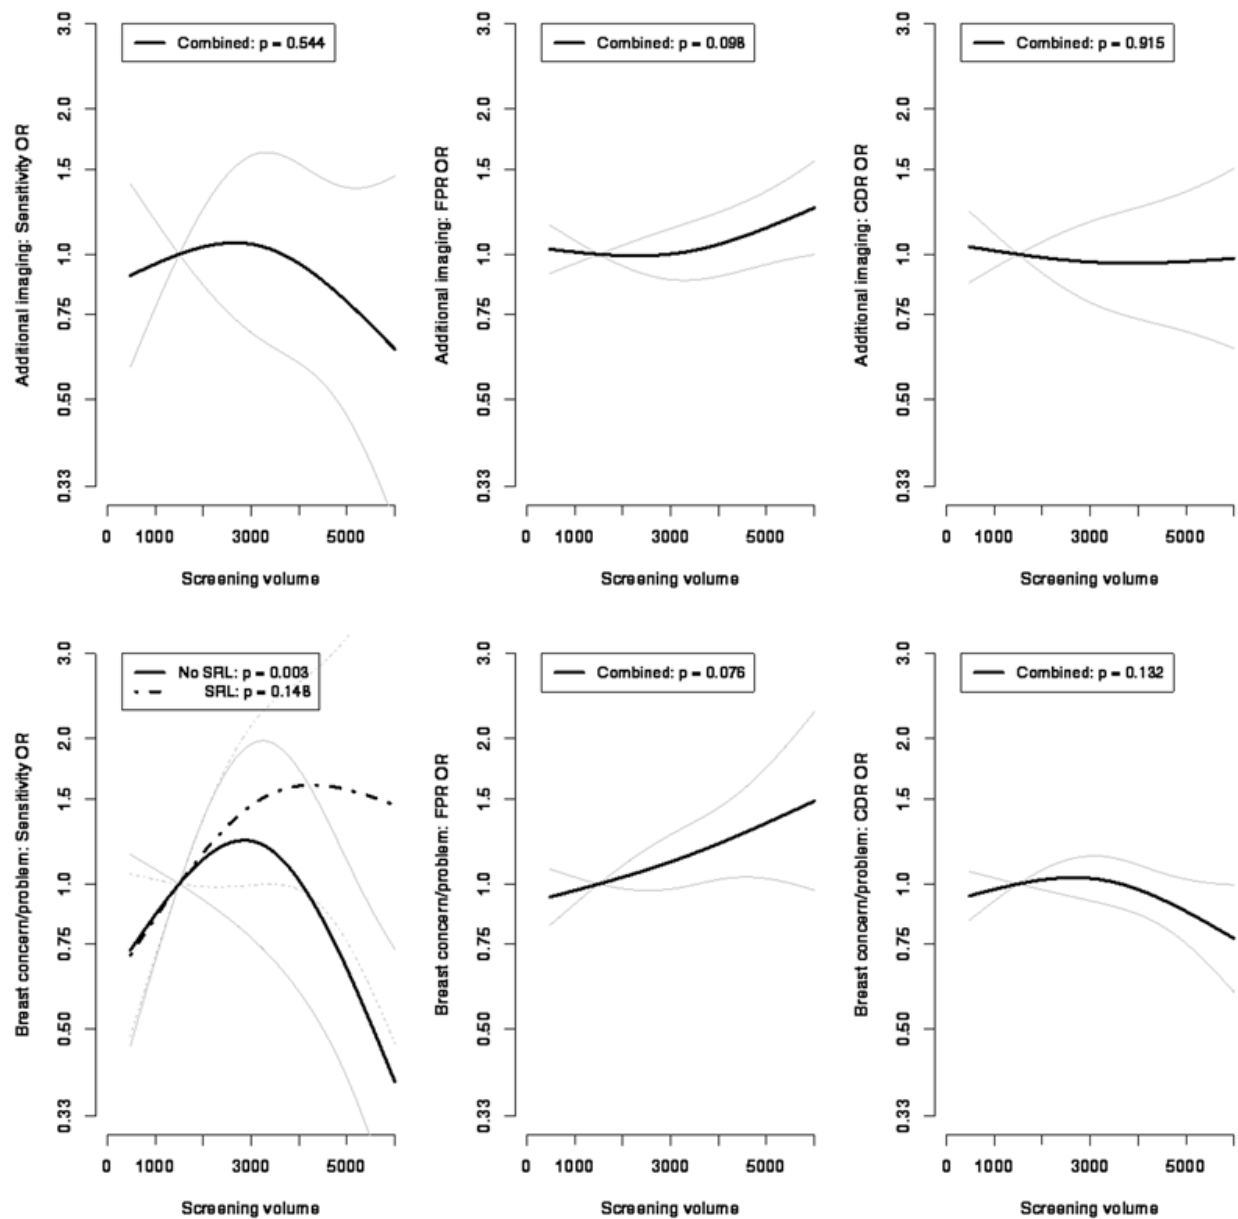

**Figure E6:** Adjusted OR associations between screening volume and sensitivity, FPR, and CDR. The upper row is for additional imaging diagnostic mammography; the lower row is for breast concern or problem diagnostic mammography. Results for breast concern or problem diagnostic mammography models where an interaction with SRL is significant are stratified by SRL. Gray lines are pointwise 95% confidence intervals;  $P$  values represent tests of whether or not there is an association based on the combined sample or within SRL strata.

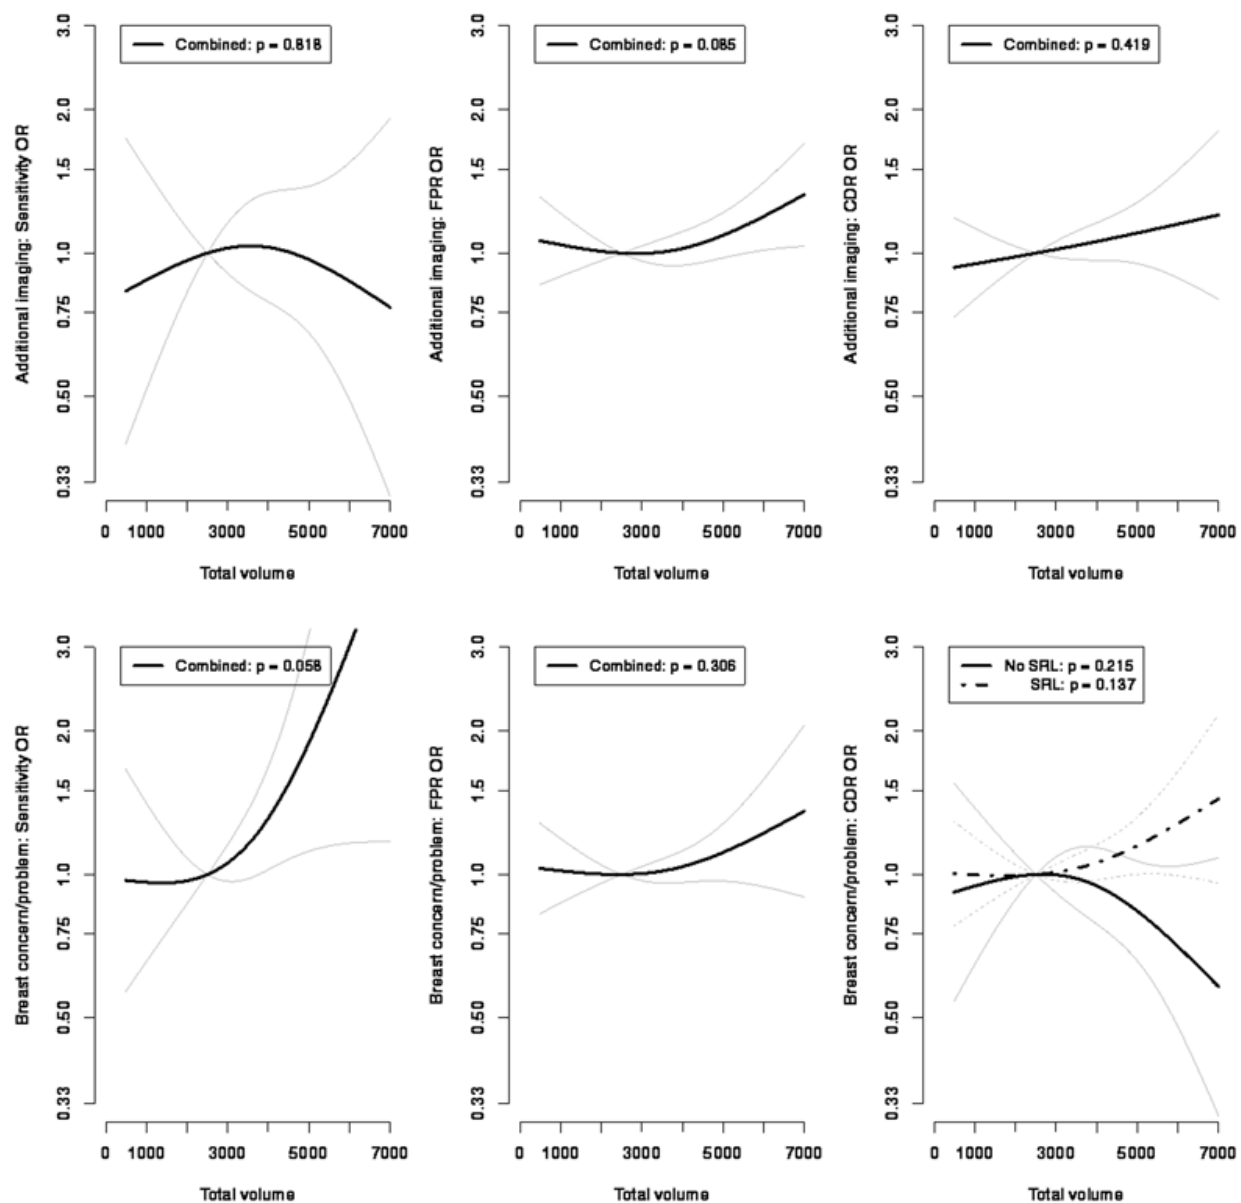

**Figure E7:** Adjusted OR associations between total volume and sensitivity, FPR, and CDR. The upper row is for additional imaging diagnostic mammography; the lower row is for breast concern or problem diagnostic mammography. Results for breast concern or problem diagnostic mammography models where an interaction with SRL is significant are stratified by SRL. Gray lines are pointwise 95% confidence intervals;  $P$  values represent tests of whether or not there is an association based on the combined sample or within SRL strata.



## Section F

**Table E5. Estimated Adjusted OR Associations and 95% CIs between Screening Volume and Sensitivity, FPR, and CDR**

| Group and Screening Volume         | Sensitivity |            |                 | FPR             |                 |                   | CDR             |                 |                   |
|------------------------------------|-------------|------------|-----------------|-----------------|-----------------|-------------------|-----------------|-----------------|-------------------|
|                                    | OR          | 95% CI     | <i>P</i> Value* | OR              | 95% CI          | <i>P</i> Value*   | OR              | 95% CI          | <i>P</i> Value*   |
| Additional imaging                 | ...         | ...        | .544            |                 |                 | .098              | ...             | ...             | .915              |
| 500 mammograms                     | 0.95        | 0.75, 1.20 | ...             | 1.01            | 0.95, 1.08      | ...               | 1.02            | 0.93, 1.12      | ...               |
| 1000 mammograms                    | 0.99        | 0.95, 1.03 | ...             | 1.00            | 0.99, 1.01      | ...               | 1.00            | 0.99, 1.02      | ...               |
| 2000 mammograms                    | 1.05        | 0.79, 1.39 | ...             | 0.99            | 0.92, 1.07      | ...               | 0.98            | 0.87, 1.10      | ...               |
| 3000 mammograms                    | 1.04        | 0.66, 1.63 | ...             | 1.01            | 0.88, 1.15      | ...               | 0.96            | 0.78, 1.19      | ...               |
| 4000 mammograms                    | 0.93        | 0.58, 1.50 | ...             | 1.06            | 0.91, 1.24      | ...               | 0.96            | 0.73, 1.26      | ...               |
| 5000 mammograms                    | 0.78        | 0.45, 1.37 | ...             | 1.14            | 0.96, 1.36      | ...               | 0.97            | 0.69, 1.36      | ...               |
| 6000 mammograms                    | 0.64        | 0.28, 1.45 | ...             | 1.25            | 1.00, 1.56      | ...               | 0.98            | 0.64, 1.51      | ...               |
| Breast concern or problem: no lump | ...         | ...        | .003            | ...             | ...             | .076 <sup>†</sup> | ...             | ...             | .132 <sup>†</sup> |
| 500 mammograms                     | 0.85        | 0.66, 1.08 | ...             | 0.97            | 0.90, 1.04      | ...               | 0.97            | 0.91, 1.03      | ...               |
| 1000 mammograms                    | 0.97        | 0.93, 1.01 | ...             | 0.99            | 0.98, 1.01      | ...               | 1.00            | 0.99, 1.01      | ...               |
| 2000 mammograms                    | 1.19        | 0.88, 1.60 | ...             | 1.06            | 0.97, 1.15      | ...               | 1.03            | 0.96, 1.10      | ...               |
| 3000 mammograms                    | 1.21        | 0.74, 1.98 | ...             | 1.13            | 0.98, 1.30      | ...               | 1.02            | 0.91, 1.14      | ...               |
| 4000 mammograms                    | 0.96        | 0.57, 1.63 | ...             | 1.23            | 1.03, 1.47      | ...               | 0.96            | 0.85, 1.08      | ...               |
| 5000 mammograms                    | 0.64        | 0.38, 1.08 | ...             | 1.35            | 1.02, 1.78      | ...               | 0.87            | 0.74, 1.02      | ...               |
| 6000 mammograms                    | 0.39        | 0.21, 0.73 | ...             | 1.49            | 0.97, 2.27      | ...               | 0.77            | 0.60, 1.00      | ...               |
| Breast concern or problem: lump    | ...         | ...        | .148            | ...             | ...             | NA                | ...             | ...             | NA                |
| 500 mammograms                     | 0.83        | 0.68, 1.02 | ...             | NA <sup>‡</sup> | NA <sup>‡</sup> | ...               | NA <sup>‡</sup> | NA <sup>‡</sup> | ...               |
| 1000 mammograms                    | 0.97        | 0.94, 1.00 | ...             | NA <sup>‡</sup> | NA <sup>‡</sup> | ...               | NA <sup>‡</sup> | NA <sup>‡</sup> | ...               |
| 2000 mammograms                    | 1.26        | 0.99, 1.62 | ...             | NA <sup>‡</sup> | NA <sup>‡</sup> | ...               | NA <sup>‡</sup> | NA <sup>‡</sup> | ...               |
| 3000 mammograms                    | 1.51        | 1.00, 2.27 | ...             | NA <sup>‡</sup> | NA <sup>‡</sup> | ...               | NA <sup>‡</sup> | NA <sup>‡</sup> | ...               |
| 4000 mammograms                    | 1.60        | 0.95, 2.69 | ...             | NA <sup>‡</sup> | NA <sup>‡</sup> | ...               | NA <sup>‡</sup> | NA <sup>‡</sup> | ...               |
| 5000 mammograms                    | 1.56        | 0.74, 3.31 | ...             | NA <sup>‡</sup> | NA <sup>‡</sup> | ...               | NA <sup>‡</sup> | NA <sup>‡</sup> | ...               |
| 6000 mammograms                    | 1.46        | 0.47, 4.54 | ...             | NA <sup>‡</sup> | NA <sup>‡</sup> | ...               | NA <sup>‡</sup> | NA <sup>‡</sup> | ...               |

Note.---For breast concern or problem mammography, an interaction with SRL was evaluated. When the interaction was not significant, a main effects--only model was fit, and no lump or lump stratum-specific estimates were the same. When the interaction was significant, no lump or lump stratum-specific estimates differed. FPR is rate per 100 mammograms; CDR is rate per 1000 mammograms. NA = not applicable.

\* Two-sided omnibus *P* value for overall association based on natural cubic spline model.

<sup>†</sup> *P* value for main effects--only model when an interaction between volume and presence of lump was not significant.

‡ Interaction with lump was not significant. See results for no lump.

**Table E6. Estimated Adjusted OR Associations and 95% CIs between Total Volume and Sensitivity, FPR, and CDR**

| Group and Screening Volume         | Sensitivity     |                 |                   | FPR             |                 |                   | CDR  |            |
|------------------------------------|-----------------|-----------------|-------------------|-----------------|-----------------|-------------------|------|------------|
|                                    | OR              | 95% CI          | <i>P</i> Value*   | OR              | 95% CI          | <i>P</i> Value*   | OR   | 95% CI     |
| Additional imaging                 | ...             | ...             | .818              | ...             | ...             | .085              | ...  | ...        |
| 500 mammograms                     | 0.87            | 0.50, 1.52      | ...               | 1.04            | 0.89, 1.22      | ...               | 0.95 | 0.79, 1.13 |
| 1000 mammograms                    | 0.92            | 0.64, 1.32      | ...               | 1.03            | 0.92, 1.14      | ...               | 0.96 | 0.86, 1.08 |
| 2000 mammograms                    | 0.99            | 0.95, 1.04      | ...               | 1.00            | 0.99, 1.02      | ...               | 0.99 | 0.98, 1.01 |
| 3000 mammograms                    | 1.03            | 0.87, 1.23      | ...               | 1.00            | 0.95, 1.05      | ...               | 1.03 | 0.97, 1.09 |
| 4000 mammograms                    | 1.02            | 0.77, 1.35      | ...               | 1.03            | 0.95, 1.13      | ...               | 1.07 | 0.97, 1.18 |
| 5000 mammograms                    | 0.96            | 0.66, 1.39      | ...               | 1.10            | 0.98, 1.24      | ...               | 1.11 | 0.94, 1.30 |
| 6000 mammograms                    | 0.87            | 0.48, 1.57      | ...               | 1.20            | 1.02, 1.42      | ...               | 1.15 | 0.88, 1.51 |
| 7000 mammograms                    | 0.77            | 0.31, 1.92      | ...               | 1.33            | 1.03, 1.70      | ...               | 1.20 | 0.80, 1.81 |
| Breast concern or problem: no lump | ...             | ...             | .058 <sup>†</sup> | ...             | ...             | .305 <sup>†</sup> | ...  | ...        |
| 500 mammograms                     | 0.96            | 0.65, 1.43      | ...               | 1.02            | 0.87, 1.20      | ...               | 0.94 | 0.64, 1.40 |
| 1000 mammograms                    | 0.96            | 0.74, 1.25      | ...               | 1.01            | 0.91, 1.12      | ...               | 0.97 | 0.75, 1.25 |
| 2000 mammograms                    | 0.99            | 0.96, 1.02      | ...               | 1.00            | 0.99, 1.01      | ...               | 1.00 | 0.97, 1.03 |
| 3000 mammograms                    | 1.11            | 0.97, 1.26      | ...               | 1.01            | 0.96, 1.06      | ...               | 0.99 | 0.88, 1.12 |
| 4000 mammograms                    | 1.40            | 1.05, 1.88      | ...               | 1.05            | 0.96, 1.14      | ...               | 0.93 | 0.76, 1.13 |
| 5000 mammograms                    | 2.01            | 1.13, 3.57      | ...               | 1.13            | 0.97, 1.31      | ...               | 0.82 | 0.64, 1.06 |
| 6000 mammograms                    | 3.12            | 1.17, 8.36      | ...               | 1.23            | 0.94, 1.61      | ...               | 0.70 | 0.47, 1.04 |
| 7000 mammograms                    | 5.07            | 1.17, 21.97     | ...               | 1.36            | 0.90, 2.06      | ...               | 0.58 | 0.31, 1.08 |
| Breast concern or problem: lump    | ...             | ...             | NA                | ...             | ...             | NA                | ...  | ...        |
| 500 mammograms                     | NA <sup>‡</sup> | NA <sup>‡</sup> | ...               | NA <sup>‡</sup> | NA <sup>‡</sup> | ...               | 1.00 | 0.83, 1.20 |
| 1000 mammograms                    | NA <sup>‡</sup> | NA <sup>‡</sup> | ...               | NA <sup>‡</sup> | NA <sup>‡</sup> | ...               | 1.00 | 0.88, 1.13 |
| 2000 mammograms                    | NA <sup>‡</sup> | NA <sup>‡</sup> | ...               | NA <sup>‡</sup> | NA <sup>‡</sup> | ...               | 1.00 | 0.98, 1.01 |
| 3000 mammograms                    | NA <sup>‡</sup> | NA <sup>‡</sup> | ...               | NA <sup>‡</sup> | NA <sup>‡</sup> | ...               | 1.02 | 0.96, 1.08 |
| 4000 mammograms                    | NA <sup>‡</sup> | NA <sup>‡</sup> | ...               | NA <sup>‡</sup> | NA <sup>‡</sup> | ...               | 1.07 | 0.98, 1.18 |
| 5000 mammograms                    | NA <sup>‡</sup> | NA <sup>‡</sup> | ...               | NA <sup>‡</sup> | NA <sup>‡</sup> | ...               | 1.17 | 1.00, 1.36 |
| 6000 mammograms                    | NA <sup>‡</sup> | NA <sup>‡</sup> | ...               | NA <sup>‡</sup> | NA <sup>‡</sup> | ...               | 1.29 | 0.99, 1.68 |
| 7000 mammograms                    | NA <sup>‡</sup> | NA <sup>‡</sup> | ...               | NA <sup>‡</sup> | NA <sup>‡</sup> | ...               | 1.44 | 0.96, 2.17 |

Note.---For breast concern or problem mammography, an interaction with SRL was evaluated. When the interaction was not significant, a main effects--only model was fit, and no lump or lump stratum-specific estimates were the same. When the interaction was significant, no lump or lump stratum-specific estimates differed. FPR is rate per 100 mammograms; CDR is rate per 1000 mammograms. NA = not applicable.

\* Two-sided omnibus *P* value for overall association based on natural cubic spline model.

<sup>†</sup> *P* value for main effects—only model when an interaction between volume and presence of lump was not significant.

<sup>‡</sup> Interaction with lump was not significant. See results for no lump.

## Section G

Tumor characteristics were collected from tumor registries and pathology databases. We investigated the prevalence of early stage cancer by considering three definitions of early: (a) ductal carcinoma in situ (DCIS) or invasive cancer, with tumors 10 mm in diameter or smaller; (b) DCIS or invasive cancer, with tumors 10 mm in diameter or smaller and node negative; or (c) DCIS or invasive cancer, with tumors smaller than 15 mm in diameter and node negative (18).

Tables E7 and E8 show tumor characteristics for additional imaging and breast concern or problem mammography stratified by the average annual diagnostic focus for the radiologist who interpreted the most recent mammogram linked to the cancer. A total of 4861 cancers were detected: a total of 2156 for additional work-up mammography and 2705 for breast concern or problem mammography. We found 72% of additional imaging cancers were invasive; the percentage was greater among breast concern or problem cancers (89%). For additional imaging, the percentage of invasive cancers decreased with increasing average annual diagnostic focus (from 80% to 72%). Among invasive breast concern or problem cancers, the median tumor size decreased from 24.5 mm to 21.0 mm across increasing the average annual diagnostic focus categories; no such pattern was found among invasive additional imaging cancers. The percentage of cancers detected at early stages generally increased and then decreased across the range of average annual diagnostic focus for all three definitions and for each type of mammography. For example, by using the first definition (DCIS or invasive cancer, with tumors 10 mm in diameter or smaller and node negative), the proportion of early cancers among additional imaging mammograms increased from 54% to 63% between average annual

diagnostic focus of 10% or less to 16%--20% and then decreased to 55% among mammograms with average annual diagnostic focus of more than 30%.

**Table E7. Distribution of Tumor Characteristics for Additional Imaging Diagnostic Mammography by Radiologist-specific Average Annual Diagnostic Focus**

| Tumor Characteristic                             | Overall (n = 2156) | Average Annual Diagnostic Focus (%) |                    |                    |                    |                    |                |
|--------------------------------------------------|--------------------|-------------------------------------|--------------------|--------------------|--------------------|--------------------|----------------|
|                                                  |                    | ≤10% (n = 87)                       | 11%--15% (n = 248) | 16%--20% (n = 841) | 21%--25% (n = 469) | 26%--30% (n = 149) | >30% (n = 362) |
| <b>Histologic type</b>                           |                    |                                     |                    |                    |                    |                    |                |
| DCIS                                             | 28                 | 20                                  | 22                 | 30                 | 29                 | 29                 | 28             |
| All invasive                                     | 72                 | 80                                  | 78                 | 70                 | 71                 | 71                 | 72             |
| <b>Stage</b>                                     |                    |                                     |                    |                    |                    |                    |                |
| 0                                                | 29                 | 21                                  | 24                 | 31                 | 30                 | 30                 | 28             |
| I                                                | 49                 | 54                                  | 52                 | 47                 | 50                 | 50                 | 48             |
| II                                               | 18                 | 20                                  | 17                 | 18                 | 17                 | 19                 | 21             |
| III or IV                                        | 4                  | 5                                   | 7                  | 4                  | 3                  | 2                  | 2              |
| Unknown                                          | 3                  | 7                                   | 8                  | 3                  | 2                  | 3                  | 1              |
| <b>Cancer size*</b>                              |                    |                                     |                    |                    |                    |                    |                |
| ≤5 mm                                            | 14                 | 15                                  | 13                 | 16                 | 14                 | 12                 | 13             |
| 6—10 mm                                          | 28                 | 28                                  | 27                 | 30                 | 30                 | 27                 | 24             |
| 11--15 mm                                        | 27                 | 25                                  | 25                 | 24                 | 28                 | 36                 | 33             |
| 16--20 mm                                        | 12                 | 15                                  | 13                 | 12                 | 11                 | 8                  | 12             |
| >20 mm                                           | 18                 | 18                                  | 22                 | 18                 | 16                 | 17                 | 18             |
| Unknown                                          | 4                  | 3                                   | 8                  | 3                  | 5                  | 4                  | 2              |
| Median cancer size* (mm)                         | NA                 | 12                                  | 13                 | 12                 | 12                 | 12                 | 12             |
| <b>Early stage at diagnosis (definition 1)</b>   |                    |                                     |                    |                    |                    |                    |                |
| DCIS or invasive cancer ≤10 mm                   | 59                 | 54                                  | 54                 | 63                 | 61                 | 57                 | 55             |
| Invasive cancer >10 mm                           | 41                 | 46                                  | 46                 | 37                 | 39                 | 43                 | 45             |
| Unknown                                          | 3                  | 2                                   | 6                  | 2                  | 3                  | 3                  | 1              |
| <b>Early stage at diagnosis (definition 2)</b>   |                    |                                     |                    |                    |                    |                    |                |
| DCIS or invasive cancer ≤10 mm and node negative | 67                 | 64                                  | 64                 | 69                 | 68                 | 68                 | 65             |
| Other                                            | 33                 | 36                                  | 36                 | 31                 | 32                 | 32                 | 35             |
| Unknown                                          | 3                  | 3                                   | 8                  | 3                  | 3                  | 2                  | 2              |
| <b>Early stage at diagnosis (definition 3)</b>   |                    |                                     |                    |                    |                    |                    |                |
| DCIS or invasive cancer <15 mm and node negative | 56                 | 50                                  | 52                 | 59                 | 59                 | 52                 | 53             |
| Other                                            | 44                 | 50                                  | 48                 | 41                 | 41                 | 48                 | 47             |
| Unknown                                          | 3                  | 3                                   | 8                  | 3                  | 3                  | 2                  | 2              |
| <b>Auxiliary lymph node status*</b>              |                    |                                     |                    |                    |                    |                    |                |
| Negative                                         | 81                 | 84                                  | 83                 | 79                 | 81                 | 82                 | 79             |
| Positive                                         | 19                 | 16                                  | 17                 | 21                 | 19                 | 18                 | 21             |
| Unknown                                          | 3                  | 3                                   | 7                  | 3                  | 3                  | 2                  | 1              |
| <b>Grade*</b>                                    |                    |                                     |                    |                    |                    |                    |                |
| 1, well differentiated                           | 28                 | 25                                  | 34                 | 29                 | 23                 | 31                 | 28             |
| 2, moderately well differentiated                | 49                 | 45                                  | 46                 | 47                 | 50                 | 50                 | 51             |
| 3/4, poorly differentiated/undifferentiated      | 24                 | 30                                  | 20                 | 24                 | 27                 | 19                 | 21             |
| Unknown                                          | 8                  | 14                                  | 16                 | 9                  | 6                  | 5                  | 3              |
| <b>Estrogen receptor status†</b>                 |                    |                                     |                    |                    |                    |                    |                |
| Negative                                         | 14                 | 26                                  | 9                  | 17                 | 12                 | 13                 | 13             |
| Positive                                         | 86                 | 74                                  | 91                 | 83                 | 88                 | 87                 | 87             |

|         |    |    |    |    |   |   |   |
|---------|----|----|----|----|---|---|---|
| Unknown | 10 | 19 | 16 | 12 | 5 | 6 | 6 |
|---------|----|----|----|----|---|---|---|

Note.---Unless otherwise indicated, data are percentages. Unknown percentages are based on all tumors; remaining percentages are based on tumors with the characteristic known. NA = not applicable.

\* Invasive cancers only.

**Table E8. Distribution of Tumor Characteristics for Breast Concern or Problem Diagnostic Mammography by Radiologist-specific Average Annual Diagnostic Focus**

| Tumor Characteristic                             | Overall (n = 2705) | Average Annual Diagnostic Focus (%) |                 |                 |                 |                 |               |
|--------------------------------------------------|--------------------|-------------------------------------|-----------------|-----------------|-----------------|-----------------|---------------|
|                                                  |                    | ≤10 (n = 163)                       | 11–15 (n = 305) | 16–20 (n = 746) | 21–25 (n = 421) | 26–30 (n = 228) | >30 (n = 842) |
| <b>Cancer histologic type</b>                    |                    |                                     |                 |                 |                 |                 |               |
| DCIS                                             | 11                 | 6                                   | 10              | 11              | 10              | 19              | 12            |
| All invasive                                     | 89                 | 94                                  | 90              | 89              | 90              | 81              | 88            |
| <b>Stage</b>                                     |                    |                                     |                 |                 |                 |                 |               |
| 0                                                | 12                 | 6                                   | 12              | 12              | 10              | 19              | 12            |
| I                                                | 33                 | 30                                  | 29              | 34              | 34              | 39              | 33            |
| II                                               | 39                 | 45                                  | 34              | 39              | 37              | 34              | 42            |
| III/IV                                           | 16                 | 18                                  | 25              | 16              | 18              | 8               | 13            |
| Unknown                                          | 5                  | 8                                   | 12              | 4               | 3               | 2               | 6             |
| <b>Cancer size*</b>                              |                    |                                     |                 |                 |                 |                 |               |
| ≤5 mm                                            | 6                  | 3                                   | 6               | 6               | 7               | 8               | 6             |
| 6–10 mm                                          | 12                 | 8                                   | 10              | 10              | 15              | 15              | 12            |
| 11–15 mm                                         | 19                 | 18                                  | 17              | 20              | 18              | 22              | 18            |
| 16--20 mm                                        | 16                 | 17                                  | 16              | 20              | 12              | 16              | 16            |
| >20 mm                                           | 47                 | 54                                  | 51              | 45              | 48              | 39              | 49            |
| Unknown                                          | 6                  | 6                                   | 12              | 4               | 5               | 4               | 5             |
| Median cancer size (mm)*                         | NA                 | 24.5                                | 23              | 20              | 21              | 17              | 21            |
| <b>Early stage at diagnosis (definition 1)</b>   |                    |                                     |                 |                 |                 |                 |               |
| DCIS or invasive cancer ≤10 mm                   | 27                 | 16                                  | 26              | 25              | 30              | 38              | 28            |
| Invasive cancer >10 mm                           | 73                 | 84                                  | 74              | 75              | 70              | 62              | 72            |
| Unknown                                          | 5                  | 6                                   | 10              | 4               | 5               | 3               | 5             |
| <b>Early stage at diagnosis (definition 2)</b>   |                    |                                     |                 |                 |                 |                 |               |
| DCIS or invasive cancer ≤10 mm and node negative | 32                 | 24                                  | 28              | 31              | 35              | 45              | 30            |
| Other                                            | 68                 | 76                                  | 72              | 69              | 65              | 55              | 70            |
| Unknown                                          | 5                  | 5                                   | 9               | 3               | 4               | 3               | 5             |
| <b>Early stage at diagnosis (definition 3)</b>   |                    |                                     |                 |                 |                 |                 |               |
| DCIS or invasive cancer <15 mm and node negative | 23                 | 13                                  | 22              | 22              | 25              | 34              | 23            |
| Other                                            | 77                 | 87                                  | 78              | 78              | 75              | 66              | 77            |
| Unknown                                          | 5                  | 5                                   | 9               | 3               | 4               | 3               | 5             |
| <b>Auxiliary lymph node status*</b>              |                    |                                     |                 |                 |                 |                 |               |
| Negative                                         | 60                 | 55                                  | 61              | 58              | 60              | 68              | 60            |
| Positive                                         | 40                 | 45                                  | 39              | 42              | 40              | 32              | 40            |
| Unknown                                          | 3                  | 3                                   | 5               | 2               | 4               | 1               | 4             |
| <b>Grade*</b>                                    |                    |                                     |                 |                 |                 |                 |               |
| 1, well differentiated                           | 18                 | 12                                  | 22              | 20              | 17              | 27              | 15            |
| 2, moderately well differentiated                | 40                 | 46                                  | 38              | 39              | 45              | 40              | 38            |
| 3/4, poorly differentiated/undifferentiated      | 42                 | 43                                  | 41              | 41              | 37              | 34              | 47            |
| Unknown                                          | 10                 | 12                                  | 20              | 8               | 11              | 8               | 6             |
| <b>Estrogen receptor status*</b>                 |                    |                                     |                 |                 |                 |                 |               |

|          |    |    |    |    |    |    |    |
|----------|----|----|----|----|----|----|----|
| Negative | 25 | 31 | 25 | 27 | 22 | 21 | 26 |
| Positive | 75 | 69 | 75 | 73 | 78 | 79 | 74 |
| Unknown  | 12 | 24 | 24 | 13 | 8  | 7  | 9  |

---

Note.---Unless otherwise indicated, data are percentages. Unknown percentages are based on all tumors; remaining percentages are based on tumors with the characteristic known. NA = not applicable.

\* Invasive cancers only.
